# Supplementary material for: First Specific Detection of Mammalian Orthoreovirus from Goats Using TaqMan Real-Time RT-PCR Technology
Source: MDPI journal article supplement (doi:10.3390/vetsci11040141), 2024-03-22

**Table S1.** Used sequences for primers design during this study.

| Accession number | Strain  | Country | Isolated from          | Isolation Date |
|------------------|---------|---------|------------------------|----------------|
| OQ789607         | SNU1    | Korea   | Bat                    | 2021           |
| MN639757.1       | 19/242  | Germany | Bank vole              | 2019           |
| MK092964.1       | OV204   | USA     | Odocoileus virginianus | 2016           |
| LC613209         | THK0325 | Japan   | wastewater             | 2020           |
| LC752173.1       | Kj22-33 | Japan   | Vespertilio sinensis   | 2022           |
| MW718862.1       | 17-EF40 | USA     | Eptesicus fuscus       | 2017           |

**Table S2.** Nucleotide sequences of primers and probe in L1 gene of MRV.

| Primers and probe | Nucleotide sequences (5'-3')        |
|-------------------|-------------------------------------|
| RT-PCR            |                                     |
| MRV-L1F           | TTCACTCAGGCATTATCCGA                |
| MRV-L1R           | TCCGCTTCTGACTCCTGA                  |
| qRT-PCR           |                                     |
| qL1F              | GTCTCAGGCTCGACAGATTAAG              |
| qL1R              | TGCAGAACGGGATCATATAAGG              |
| probe             | FAM-AGTTTGTGTTGGCGTTATTGGTGGC-TAMRA |

**Table S3** The Ct values obtained with 10-fold serial dilutions ( $1 \times 10^8$  to  $1 \times 10^1$ ) of MRV standard plasmid by TaqMan RT-PCR method

|          | QuantStudio6 |        |        | 7500   |        |        | Step One |        |        |        |       |      |
|----------|--------------|--------|--------|--------|--------|--------|----------|--------|--------|--------|-------|------|
| Log10/ul | Ct1          | Ct2    | Ct3    | Ct1    | Ct2    | Ct3    | Ct1      | Ct2    | Ct3    | Mean   | SD    | CV%  |
| 1        | 38.867       | 38.812 | 38.924 | 38.904 | 38.96  | 38.901 | 39.578   | 39.272 | 39.365 | 39.054 | 0.281 | 0.72 |
| 2        | 34.466       | 34.51  | 34.445 | 34.575 | 34.522 | 34.516 | 34.907   | 34.989 | 35.095 | 34.669 | 0.253 | 0.73 |
| 3        | 31.055       | 31.048 | 31.051 | 31.534 | 31.544 | 31.628 | 31.553   | 31.659 | 31.476 | 31.394 | 0.263 | 0.84 |
| 4        | 27.577       | 27.583 | 27.615 | 27.613 | 27.589 | 27.592 | 28.087   | 28.288 | 28.273 | 27.802 | 0.316 | 1.14 |
| 5        | 24.231       | 24.254 | 24.238 | 24.245 | 24.257 | 24.233 | 24.635   | 24.763 | 24.746 | 24.400 | 0.239 | 0.98 |
| 6        | 20.702       | 20.713 | 20.686 | 20.399 | 20.445 | 20.223 | 21.203   | 21.105 | 21.019 | 20.722 | 0.335 | 1.62 |
| 7        | 17.354       | 17.334 | 17.377 | 17.056 | 17.168 | 17.274 | 17.655   | 17.761 | 17.656 | 17.404 | 0.239 | 1.37 |
| 8        | 12.617       | 12.636 | 12.617 | 12.225 | 12.339 | 12.227 | 13.033   | 13.029 | 13.132 | 12.651 | 0.350 | 2.77 |

**Table S4** The Ct values obtained from serial dilutions ( $1 \times 10^6$  to  $1 \times 10^{0.25}$  TCID<sub>50</sub>/ml) of MRV standard RNA by TaqMan RT-PCR method

| TCID <sub>50</sub> /ml<br>(log10) | Ct1   | Ct2   | Ct3   |
|-----------------------------------|-------|-------|-------|
| 0.25                              | 36.32 | 36.44 | 36.33 |
| 0.5                               | 34.95 | 35.43 | 35.81 |
| 1                                 | 33.52 | 33.36 | 33.97 |
| 2                                 | 30.31 | 30.25 | 30.29 |
| 3                                 | 27.11 | 27.23 | 27.13 |

|   |       |       |       |
|---|-------|-------|-------|
| 4 | 24.04 | 24.12 | 24.17 |
| 5 | 20.86 | 20.91 | 20.84 |
| 6 | 17.68 | 17.73 | 17.75 |

**Table S5.** Intra-and inter-assay variability of the TaqMan RT-qPCR for MRV detection.

| Sample | Intra assay |        |        |         |      |      | Inter assay |        |        |         |      |      |
|--------|-------------|--------|--------|---------|------|------|-------------|--------|--------|---------|------|------|
|        | Ct1         | Ct2    | Ct3    | Ct mean | SD   | CV%  | Ct1         | Ct2    | Ct3    | Ct mean | SD   | CV%  |
| 1      | 13.247      | 13.456 | 13.566 | 13.42   | 0.16 | 1.2  | 13.117      | 13.516 | 13.668 | 13.43   | 0.28 | 2.06 |
| 2      | 24.536      | 24.609 | 24.165 | 24.44   | 0.24 | 1.00 | 24.763      | 25.201 | 24.14  | 24.70   | 0.53 | 2.14 |
| 3      | 28.202      | 28.203 | 28.039 | 28.15   | 0.09 | 0.33 | 29.428      | 27.754 | 28.179 | 28.45   | 0.87 | 3.05 |
| 4      | 26.848      | 26.784 | 26.991 | 26.87   | 0.11 | 0.29 | 26.006      | 27.551 | 25.832 | 26.46   | 0.95 | 3.60 |
| 5      | 22.911      | 22.707 | 21.935 | 22.50   | 0.51 | 2.16 | 22.732      | 21.852 | 23.347 | 22.64   | 0.75 | 3.31 |
| 6      | 19.673      | 19.509 | 19.562 | 19.58   | 0.08 | 0.3  | 19.283      | 19.579 | 19.912 | 19.59   | 0.31 | 1.60 |

SD—Standard deviation. % CV—Percent coefficient variation.

**Table S6** The Ct values of different viruses detected by TaqMan RT-PCR method

|     | MRV-F2B | MRV-SY13 | MRV-JS6 | MRV-JS1 | MRV-XJ23 | BADV | BVDV | CEV    | CPIV | PPRV | BRV | PRV    | COV |
|-----|---------|----------|---------|---------|----------|------|------|--------|------|------|-----|--------|-----|
| Ct1 | 18.334  | 14.187   | 19.631  | 13.739  | 22.984   | /    | /    | /      | /    | /    | /   | /      | /   |
| Ct2 | 18.379  | 14.098   | 19.8376 | 14.026  | 23.017   | /    | /    | /      | /    | /    | /   | /      | /   |
| Ct3 | 18.865  | 14.596   | 19.937  | 13.925  | 23.578   | /    | /    | 39.974 | /    | /    | /   | 39.918 | /   |

/: undetected.

**Figure S1.** Sequence alignment of a conserved fragment of the L1 gene. PCR primers are marked in blue flame, and probe in red.

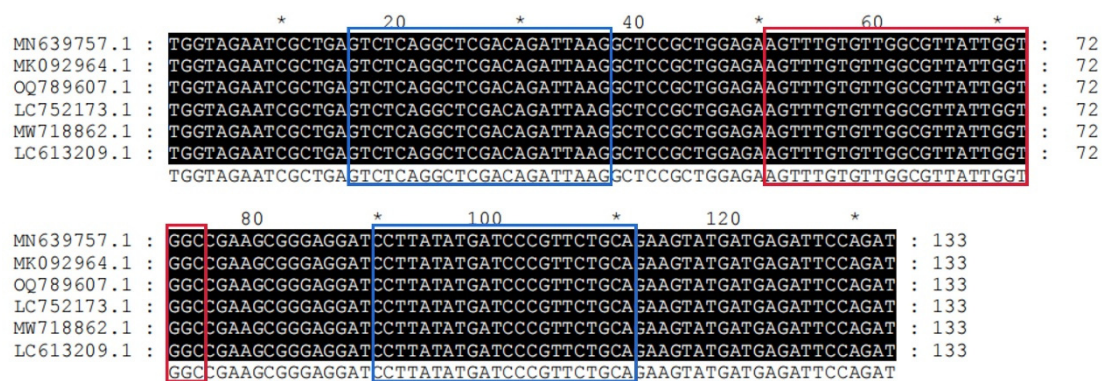

Supplement: s1 [file s1]
